# Supplementary material
Source: publisher figshare collection journal article supplement (https://frontiersin.figshare.com/ndownloader/files/34493393)
Supplement: Supplementary file [file 34493393]

# Supplementary Material

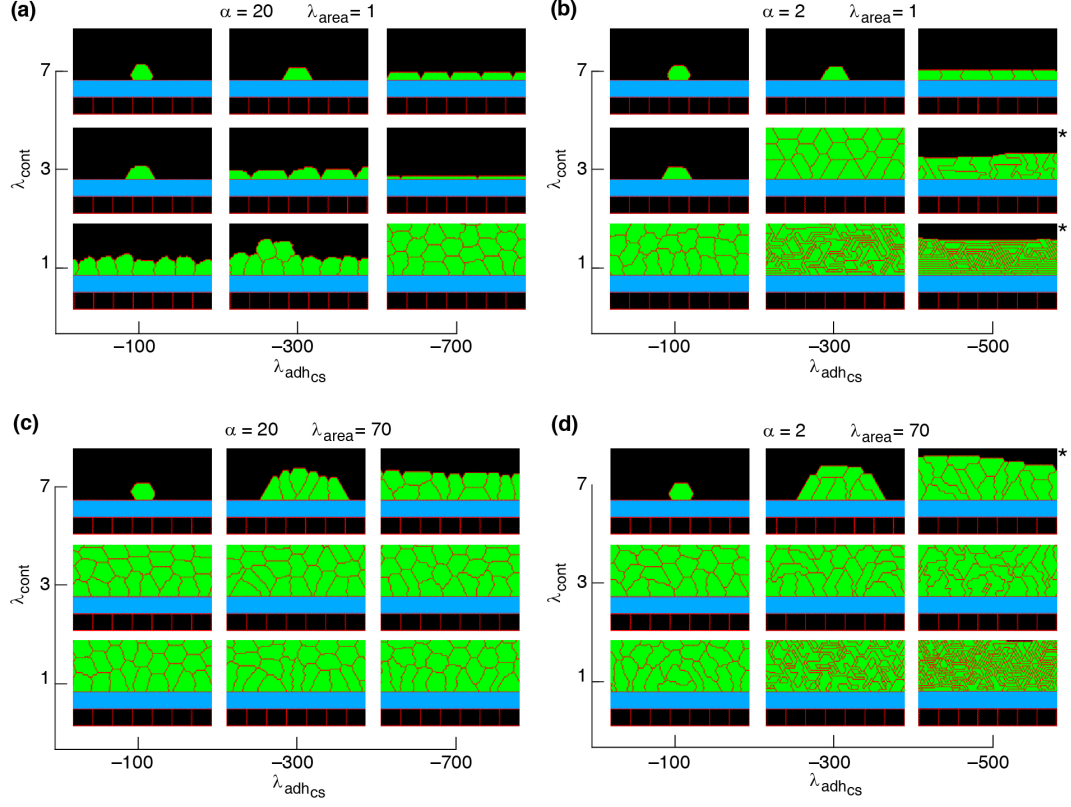

Figure S1: Phase diagram of collective cell morphologies with random orientation of cell proliferation.  $\alpha = \lambda_{\text{adh}_{\text{CS}}} / \lambda_{\text{adh}_{\text{CC}}}$ . \*Slow-growing multilayers. See Movies 9, 10.

## Movie captions

**Movie 1.** A simulation of a monolayer of squamous cells, where the axis of cell proliferation is perpendicular to the substrate, i.e.,  $n_{\text{div}} = (1, 0)$ ; see Equation (3). Simulation parameters are:  $\lambda_{\text{area}} = 1$ ,  $\lambda_{\text{cont}} = 7$ ,  $\lambda_{\text{adh}_{\text{cs}}} = -700$ , and  $\lambda_{\text{adh}_{\text{cc}}} = -35$ .

**Movie 2.** A simulation of a monolayer of cuboidal cells, where the axis of cell proliferation is perpendicular to the substrate, i.e.,  $n_{\text{div}} = (1, 0)$ ; see Equation (3). Simulation parameters are:  $\lambda_{\text{area}} = 1$ ,  $\lambda_{\text{cont}} = 1$ ,  $\lambda_{\text{adh}_{\text{cs}}} = -700$ , and  $\lambda_{\text{adh}_{\text{cc}}} = -35$ .

**Movie 3.** A simulation of a monolayer of columnar cells. Simulation parameters are:  $\lambda_{\text{area}} = 70$ ,  $\lambda_{\text{cont}} = 7$ ,  $\lambda_{\text{adh}_{\text{cs}}} = -700$ , and  $\lambda_{\text{adh}_{\text{cc}}} = -35$ . The axis of cell proliferation is perpendicular to the substrate, i.e.,  $n_{\text{div}} = (1, 0)$ ; see Equation (3).

**Movie 4.** A simulation of a multilayer structure, where the axis of cell proliferation is perpendicular to the substrate, i.e.,  $n_{\text{div}} = (1, 0)$ ; see Equation (3). Simulation parameters are:  $\lambda_{\text{area}} = 70$ ,  $\lambda_{\text{cont}} = 1$ ,  $\lambda_{\text{adh}_{\text{cs}}} = -700$ , and  $\lambda_{\text{adh}_{\text{cc}}} = -35$ .

**Movie 5.** A simulation of a monolayer of cuboidal cells, where the axis of cell proliferation is perpendicular to the substrate, i.e.,  $n_{\text{div}} = (1, 0)$ ; see Equation (3). Simulation parameters are:  $\lambda_{\text{area}} = 1$ ,  $\lambda_{\text{cont}} = 1$ ,  $\lambda_{\text{adh}_{\text{cs}}} = -100$ , and  $\lambda_{\text{adh}_{\text{cc}}} = -5$ .

**Movie 6.** A simulation of a non-confluent structure. Simulation parameters are:  $\lambda_{\text{area}} = 1$ ,  $\lambda_{\text{cont}} = 3$ ,  $\lambda_{\text{adh}_{\text{cs}}} = -300$ , and  $\lambda_{\text{adh}_{\text{cc}}} = -15$ . The axis of cell proliferation is parallel to the substrate, i.e.,  $n_{\text{div}} = (0, 1)$ ; see Equation (3).

**Movie 7.** A simulation of a multilayer structure, where the axis of cell proliferation is parallel to the substrate, i.e.,  $n_{\text{div}} = (0, 1)$ ; see Equation (3). Simulation parameters are:  $\lambda_{\text{area}} = 70$ ,  $\lambda_{\text{cont}} = 3$ ,  $\lambda_{\text{adh}_{\text{cs}}} = -300$ , and  $\lambda_{\text{adh}_{\text{cc}}} = -150$ .

**Movie 8.** A simulation of a monolayer, where the axis of proliferation is along the major axis of the cells. Simulation parameters are:  $\lambda_{\text{area}} = 70$ ,  $\lambda_{\text{cont}} = 7$ ,  $\lambda_{\text{adh}_{\text{cs}}} = -700$ , and  $\lambda_{\text{adh}_{\text{cc}}} = -35$ .

**Movie 9.** A simulation of a monolayer of squamous cells, with random orientation of cell proliferation. Simulation parameters are:  $\lambda_{\text{area}} = 1$ ,  $\lambda_{\text{cont}} = 3$ ,  $\lambda_{\text{adh}_{\text{cs}}} = -300$ , and  $\lambda_{\text{adh}_{\text{cc}}} = -15$ .

**Movie 10.** A simulation of a multilayer structure, with random orientation of cell proliferation. Simulation parameters are:  $\lambda_{\text{area}} = 70$ ,  $\lambda_{\text{cont}} = 3$ ,  $\lambda_{\text{adh}_{\text{cs}}} = -300$ , and  $\lambda_{\text{adh}_{\text{cc}}} = -150$ .
